# Supplementary material for: Surrogate in vitro activation of innate immunity synergizes with interleukin-7 to unleash rapid antigen-driven outgrowth of CD4+ and CD8+ human peripheral blood T-cells naturally recognizing MUC1, HER2/neu and other tumor-associated antigens
Source: PubMed Central journal article supplement (PMC5355224; doi:10.18632/oncotarget.13911), 2016-12-11
Supplement: oncotarget-08-10785-s001.pdf [file oncotarget-08-10785-s001.pdf]

**Surrogate *in vitro* activation of innate immunity synergizes with interleukin-7 to unleash rapid antigen-driven outgrowth of CD4+ and CD8+ human peripheral blood T-cells naturally recognizing MUC1, HER2/neu and other tumor-associated antigens**

**Supplementary Material**

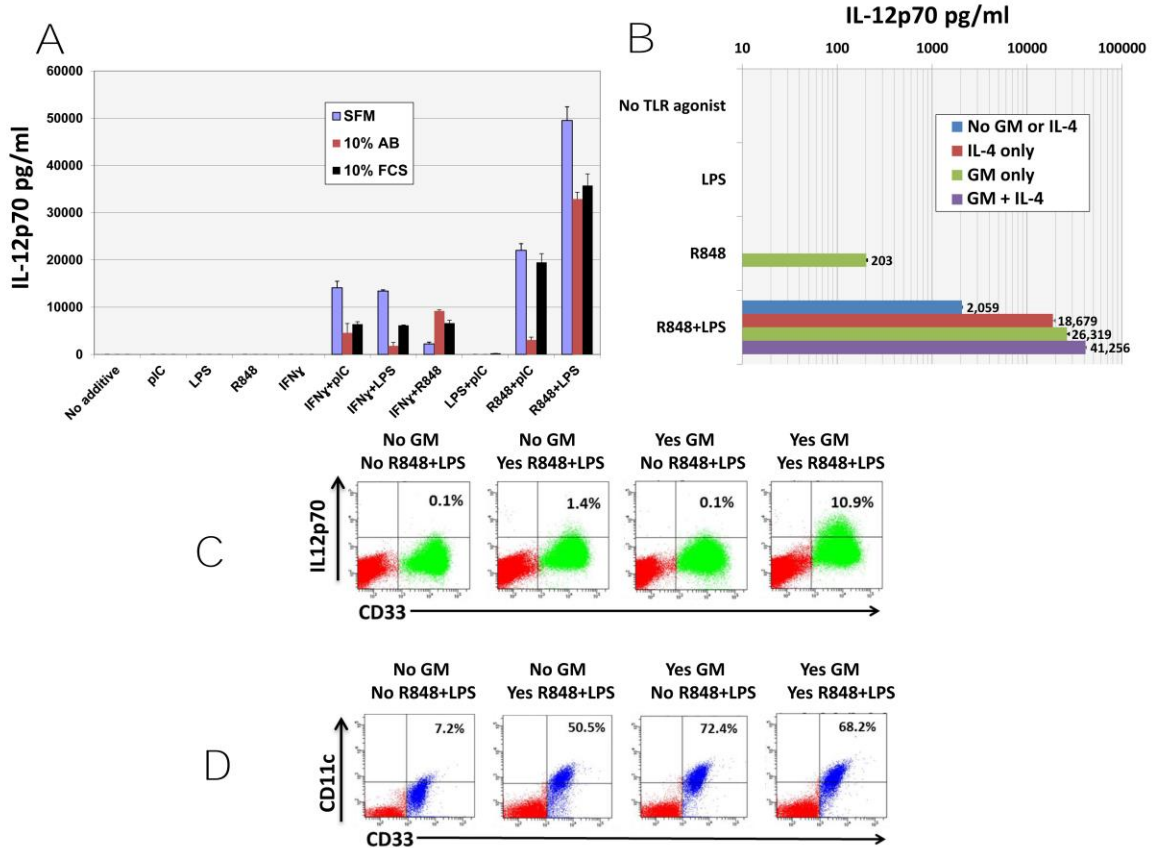

**Supplemental Fig S1: Functional activation of CD33+ (myeloid) PBMC during the first 2 days of culture:** **A.** IL-12p70 production by CD33+ PBMC is strongly impacted by culture media. Cultures as in Fig 1A, comparing impacts of media upon danger signal-induced IL-12p70 production. Complete RPMI 1640 supplemented with 10% heat-deactivated human AB serum was compared to RPMI 1640 10% FCS, and to Gibco macrophage SFM, all groups receiving GM-CSF (GM) and IL-4 on d0 and various danger signals on d1 for a d2 harvest. Representative of two biological replicates. **B.** Culture as in Fig 1A, comparing impacts of 40 ng/ml GM and/or 20ng/ml IL-4 upon danger signal-induced IL-12p70 production in RPMI 1640 with 10% human AB serum. Representative of two biological replicates. Note that IL-12p70 production is shown in log scale. **C.** d2 PBMC stained for surface CD33 and intracellular IL-12p70 demonstrating that IL-12p70 production was confined to the CD33+ myeloid fraction (green subpopulation). Right upper quadrants (RUQ) show % of CD33+ cells that are also IL-12p70+, with background isotype control staining subtracted. **D.** d2 PBMC stained for surface CD33 and surface CD11c, demonstrating that treatment with GM and/or TLR agonists resulted in generalized myeloid cell expression of CD11c (blue subpopulation). RUQ shows % of CD33+ cells that are also CD11c+, with background isotype control staining subtracted. Representative of three biological replicates.

## Supplemental Table S1: Calculations for regression analyses in Figure 2

- CD4 Linear Regression
  - $R^2 = 0.84244$ , Adjusted  $R^2 = 0.77491$
  - ANOVA: Test of Strength of Multiple Linear Regression, If valid model, then  $p < 0.02$ 
    - $p = 0.00613$ , so valid model
  - Which Dependent Variable Is Significantly Associated With Response
    - IL2,  $p = 0.37771$
    - **IL7,  $p = 0.00185$**
    - IL15,  $p = 0.35285$
    - IL21,  $p = 0.56173$
  
- CD8 Linear Regression
  - $R^2 = 0.80289$ , Adjusted  $R^2 = 0.71841$
  - ANOVA: Test of Strength of Multiple Linear Regression, If valid model, then  $p < 0.02$ 
    - $p = 0.01295$ , so valid model
  - Which Dependent Variable Is Significantly Associated With Response
    - IL2,  $p = 0.58893$
    - **IL7,  $p = 0.00572$**
    - IL15,  $p = 0.44131$
    - IL21,  $p = 0.79968$
  
- Fold Expansion Linear Regression
  - $R^2 = 0.9034$ , Adjusted  $R^2 = 0.862$
  - ANOVA: Test of Strength of Multiple Linear Regression, If valid model, then  $p < 0.02$ 
    - $p = 0.00117$ , so valid model
  - Which Dependent Variable Is Significantly Associated With Response
    - IL2,  $p = 0.53234$
    - **IL7,  $p = 0.00406$**
    - IL15,  $p = 0.35856$
    - IL21,  $p = 0.31246$

**Supplemental Table S2: 29 HLA-DR haplotypes encompass nearly 90% of individuals.** Peptide regions with clusters of embedded 15-17mers displaying high affinity for these haplotypes are designated as promisingly promiscuous “hot spots” for MHC Class II binding.

| <b>Supplemental Table 2: Identification of HLA-DR Alleles Across Races and Ethnicities</b> |                                   |                            |                          |                           |                         |                           |                         |
|--------------------------------------------------------------------------------------------|-----------------------------------|----------------------------|--------------------------|---------------------------|-------------------------|---------------------------|-------------------------|
| <b>DRB1 Alleles</b>                                                                        | <b>African American Frequency</b> | <b>Caucasian Frequency</b> | <b>Chinese Frequency</b> | <b>Hispanic Frequency</b> | <b>Indian Frequency</b> | <b>Japanese Frequency</b> | <b>Korean Frequency</b> |
| 0101                                                                                       | 2.65%                             | 8.60%                      | 0.93%                    | 4.33%                     | 3.21%                   | 5.84%                     | 5.78%                   |
| 0102                                                                                       | 3.92%                             | 1.38%                      | 0.07%                    | 3.32%                     | 0.13%                   | 0.06%                     | 0.02%                   |
| 0301                                                                                       | 6.99%                             | 12.16%                     | 6.81%                    | 6.95%                     | 7.46%                   | 0.68%                     | 2.20%                   |
| 0302                                                                                       | 6.31%                             | 0.03%                      | 0.00%                    | 0.50%                     | 0.01%                   | 0.01%                     | 0.00%                   |
| 0401                                                                                       | 2.02%                             | 8.78%                      | 0.51%                    | 1.81%                     | 0.90%                   | 1.15%                     | 0.78%                   |
| 0403                                                                                       | 0.17%                             | 0.79%                      | 2.31%                    | 1.84%                     | 5.27%                   | 2.43%                     | 2.57%                   |
| 0404                                                                                       | 0.82%                             | 3.88%                      | 0.88%                    | 5.76%                     | 2.01%                   | 0.32%                     | 1.39%                   |
| 0405                                                                                       | 1.53%                             | 0.67%                      | 6.12%                    | 2.22%                     | 0.75%                   | 14.72%                    | 8.94%                   |
| 0407                                                                                       | 0.39%                             | 1.12%                      | 0.08%                    | 7.47%                     | 0.13%                   | 0.64%                     | 0.44%                   |
| 0701                                                                                       | 10.11%                            | 13.42%                     | 5.31%                    | 9.61%                     | 16.95%                  | 0.94%                     | 7.15%                   |
| 0802                                                                                       | 0.09%                             | 0.08%                      | 0.55%                    | 9.64%                     | 0.51%                   | 4.34%                     | 2.50%                   |
| 0803                                                                                       | 0.04%                             | 0.24%                      | 6.80%                    | 0.27%                     | 0.71%                   | 7.44%                     | 7.62%                   |
| 0804                                                                                       | 5.42%                             | 0.20%                      | 0.01%                    | 0.68%                     | 0.08%                   | 0.02%                     | 0.00%                   |
| 0901                                                                                       | 2.97%                             | 1.03%                      | 15.54%                   | 0.82%                     | 0.94%                   | 13.87%                    | 9.67%                   |
| 1001                                                                                       | 1.92%                             | 0.85%                      | 1.34%                    | 1.30%                     | 6.28%                   | 0.40%                     | 1.70%                   |
| 1101                                                                                       | 8.54%                             | 5.56%                      | 6.26%                    | 3.55%                     | 5.98%                   | 2.58%                     | 4.73%                   |
| 1104                                                                                       | 0.58%                             | 2.95%                      | 0.25%                    | 3.25%                     | 1.97%                   | 0.12%                     | 0.07%                   |
| 1201                                                                                       | 3.82%                             | 1.64%                      | 3.42%                    | 0.91%                     | 0.60%                   | 3.75%                     | 4.83%                   |
| 1202                                                                                       | 0.29%                             | 0.02%                      | 11.50%                   | 0.15%                     | 2.99%                   | 1.71%                     | 3.45%                   |
| 1301                                                                                       | 5.42%                             | 5.63%                      | 0.78%                    | 3.72%                     | 6.73%                   | 0.76%                     | 1.73%                   |
| 1302                                                                                       | 7.30%                             | 4.88%                      | 2.42%                    | 3.50%                     | 3.37%                   | 5.75%                     | 8.62%                   |
| 1303                                                                                       | 3.26%                             | 1.09%                      | 0.02%                    | 1.06%                     | 0.13%                   | 0.04%                     | 0.01%                   |
| 1401                                                                                       | 1.86%                             | 2.61%                      | 3.33%                    | 1.84%                     | 1.13%                   | 3.01%                     | 2.68%                   |
| 1404                                                                                       | 0.05%                             | 0.07%                      | 0.51%                    | 0.03%                     | 7.13%                   | 0.02%                     | 0.06%                   |
| 1406                                                                                       | 0.01%                             | 0.02%                      | 0.02%                    | 4.27%                     | 0.05%                   | 1.42%                     | 0.68%                   |
| 1501                                                                                       | 2.82%                             | 13.46%                     | 10.12%                   | 6.43%                     | 9.02%                   | 8.67%                     | 7.94%                   |
| 1502                                                                                       | 0.23%                             | 0.72%                      | 2.66%                    | 1.17%                     | 10.73%                  | 9.67%                     | 3.18%                   |
| 1503                                                                                       | 11.66%                            | 0.05%                      | 0.00%                    | 0.58%                     | 0.02%                   | 0.01%                     | 0.00%                   |
| 1602                                                                                       | 1.38%                             | 0.15%                      | 4.35%                    | 2.47%                     | 0.67%                   | 0.67%                     | 0.99%                   |
| <b>Total Coverage</b>                                                                      | <b>92.6%</b>                      | <b>92.1%</b>               | <b>92.9%</b>             | <b>89.4%</b>              | <b>95.8%</b>            | <b>91.0%</b>              | <b>89.7%</b>            |

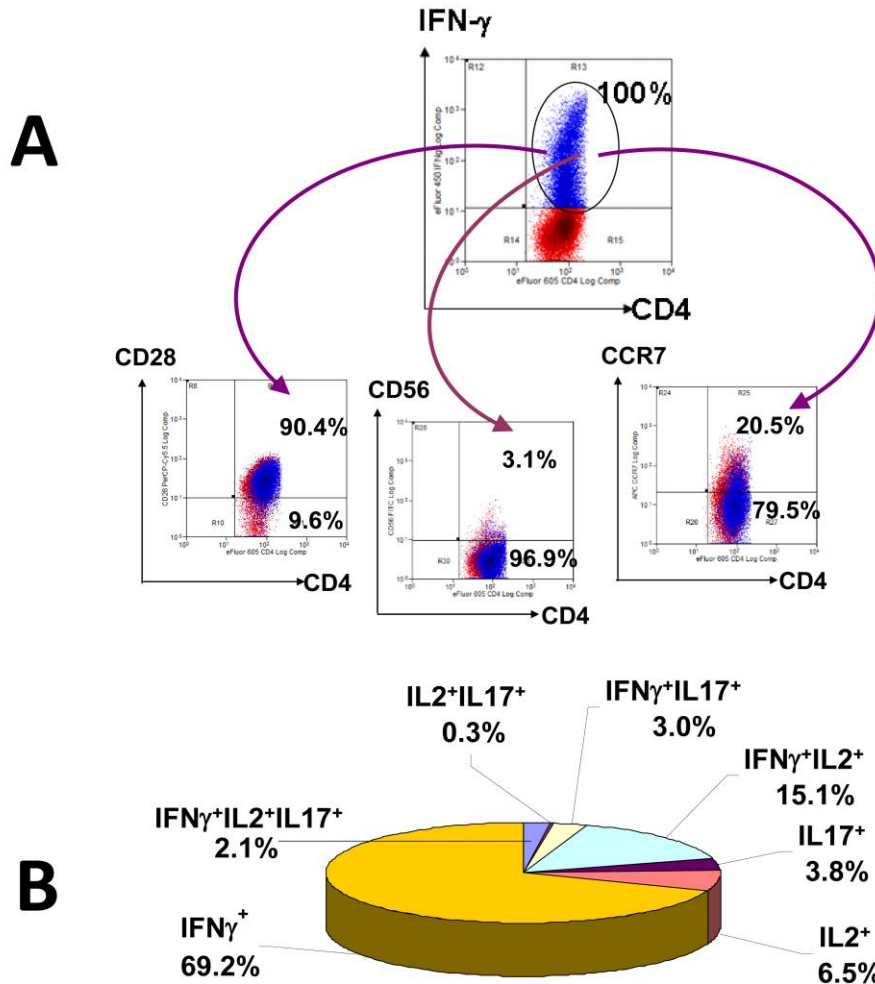

**Supplemental Fig S2: Phenotype and functional analyses of culture-expanded PBMC-derived T-cells.** CAN-driven, GM+R848+LPS conditioned PBMC-derived T-cell cultures were restimulated with CAN-pulsed PBMC in an ICC assay on d16. Cultures were run as described in Fig 1B-D. **A.** Co-expression of functional markers. CD4<sup>+</sup> T-cells staining positively for intracellular IFN $\gamma$  upon CAN restimulation (blue subpopulation) were co-analyzed for CD28, CD56, and CCR7. It was observed that >90% of IFN $\gamma$ <sup>+</sup> cells costained for CD28 and <5% for CD56. Subsets of both CCR7<sup>+</sup> and CCR7<sup>-</sup> IFN $\gamma$ <sup>+</sup> cells were observed, consistent with a mix of central memory and memory effector T-cells. **B.** CD4<sup>+</sup> T-cells reexposed to CAN were simultaneously stained intracellularly for IFN $\gamma$ , IL-2 and IL-17 using distinctive fluorochrome conjugates. Percentages of cells staining positivity for at least one of these cytokines were enumerated. This is representative of 3 experiments examining simultaneous T-cell production of multiple cytokines.

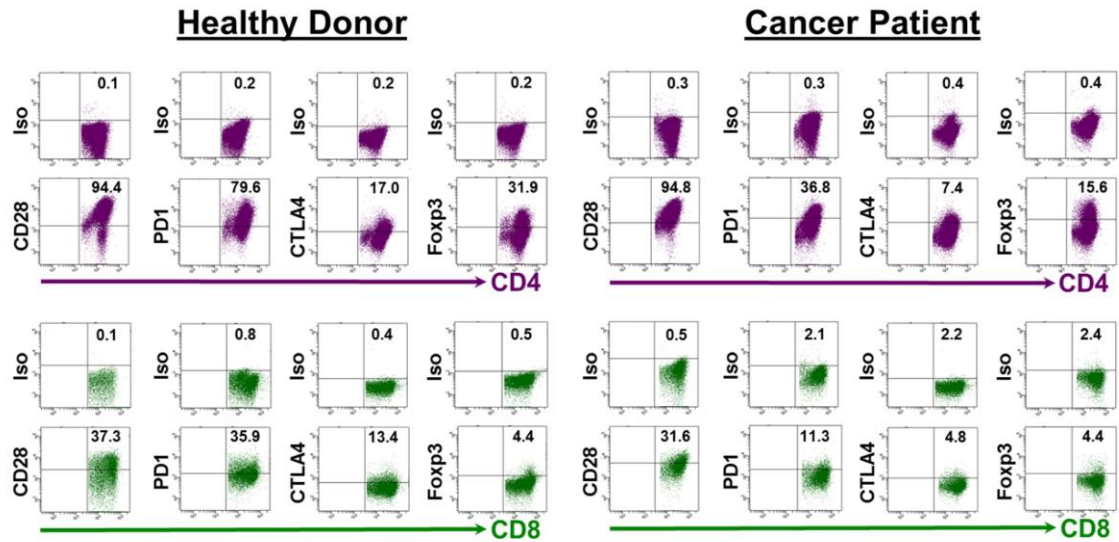

**Supplemental Fig S3: CD28, PD1, CTLA4 and Foxp3 expression on T-cells at end of culture.** Multicolored FACS analysis of CMVpp65-driven, PBMC-derived T-cell cultures run from a healthy donor and a patient with metastatic breast cancer (cultures performed as in **Fig 1B** “GM+R848+LPS” group), showing T-cell co-expression of CD28, PD1, CTLA4 and Foxp3 (see Methods for staining details). Analyses are gated to show CD4+ or CD8+ cells. Numbers shown in RUQs indicate the % of CD4+ or CD8+ T-cells co-expressing the molecules of interest. Representative of 3 biological replicates.

## Healthy Donor

## Cancer Patient

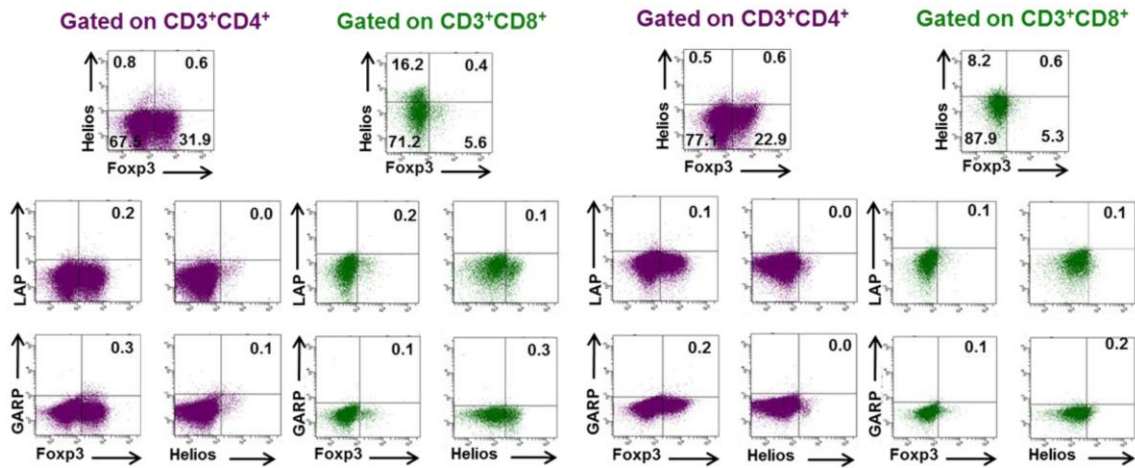

**Supplemental Fig S4: Foxp3, Helios, LAP and GARP co-expression on T-cells at end of culture.** Multicolored FACS analysis of CMVpp65-driven, PBMC-derived T-cell cultures run from a healthy donor and a patient with metastatic breast cancer (cultures run as in **Fig 1B**, see Methods for staining details). Analyses are gated to show CD4<sup>+</sup> or CD8<sup>+</sup> cells, with numbers in each right upper quadrant (RUQ) indicating the % of total CD4<sup>+</sup> or CD8<sup>+</sup> T-cells within the quadrant co-expressing the molecule(s) of interest. Representative of 3 biological replicates.

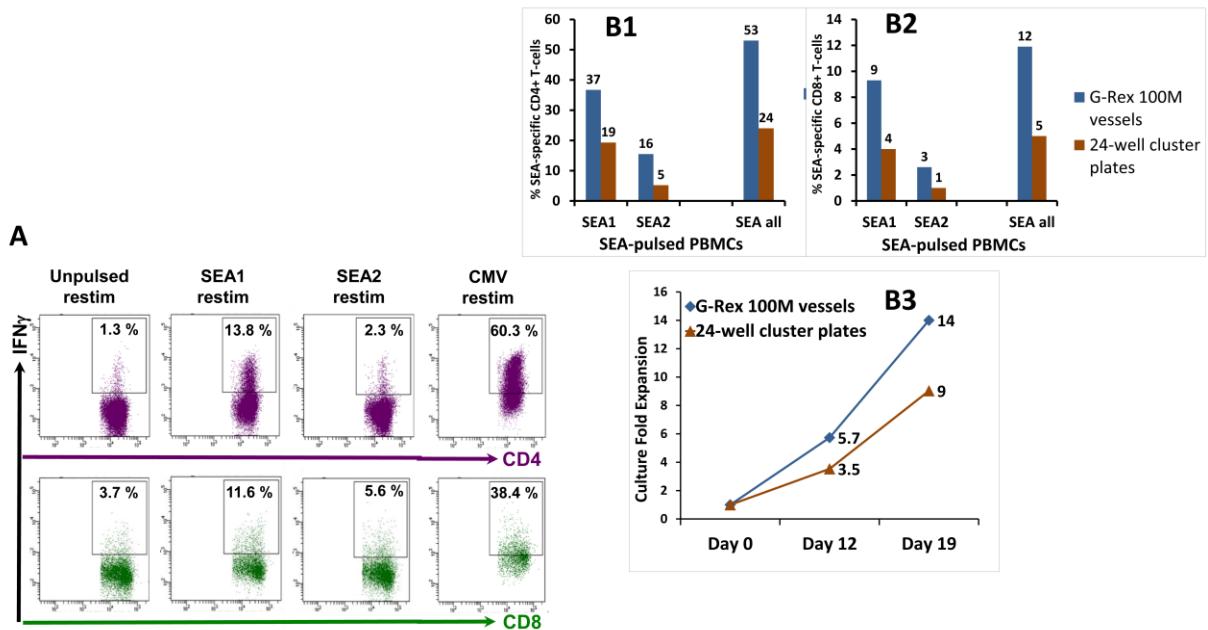

**Supplemental Fig S5: T-cells cultured from unfractionated PBMC can be effectively driven by cocktails containing multiple antigenic peptides, and can be effectively expanded in scaled-up culture vessels. A.** PBMC were obtained by venipuncture from a patient with advanced breast cancer. With cultures performed as in **Fig 1B** “GM+R848+LPS” group, PBMC were exposed on culture d1 to a cocktail of SEA1, SEA2 and CMV peptides. Prior experiments demonstrated that while pulsing individual peptides at 50  $\mu\text{g}/\text{ml}$  was most effective for driving T-cell sensitization, combining the peptides in a cocktail was most effective when only 10  $\mu\text{g}/\text{ml}$  of each peptide was added (not shown). Plots show % of CD4+ or CD8+ T-cells producing IFN $\gamma$  at culture end when restimulated with freshly thawed autologous PBMC either unpulsed (UP) or pulsed with the individual peptides. The ability to employ this culture method to successfully drive MUC1- and/or HER2-specific T-cells, both CD4+ and CD8+, was observed for four out of four patients at various stages of breast cancer. **B.** PBMC from a healthy donor cultured as in **Fig 1B**, exposed to a cocktail of SEA1+SEA2 peptides during culture in either 24 well cluster plates or scaled up in G-Rex 100M (1-liter) culture vessels. Panels show frequencies of SEA-specific CD4+ (**B1**) and CD8+ (**B2**) T-cells when assayed on day 19 of culture, as well as the fold increase in absolute numbers (gross expansion) (**B3**). This is representative of three biological replicates.
